# Supplementary material for: Synthesis, structure and magnetic properties of hydroxychlorides A3Cu3(OH)Cl8(A = Cs, Rb) with isolated tricopper
Source: Royal Society of Chemistry journal article supplement (doi:10.1039/c5ce01310k), 2015-01-01
Supplement: c5ce01310k1.pdf [file c5ce01310k1.pdf]

## Supporting Information

### Synthesis, Structure and Magnetic Properties of Hydroxychlorides

#### $A_3Cu_3(OH)Cl_8$ (A = Cs, Rb) with Isolated Tricopper

Wenbin Guo,<sup>†</sup> Yingying Tang,<sup>†,‡,‡</sup> Suyun Zhang,<sup>†</sup> Hongping Xiang,<sup>†</sup> Ming Yang,<sup>†</sup>  
Zhangzhen He<sup>\*,†,‡</sup>

<sup>†</sup>State Key Laboratory of Structural Chemistry, Fujian Institute of Research on the Structure of Matter, Chinese Academy of Sciences, Fuzhou, Fujian 350002, P. R. China

<sup>‡</sup>Key Laboratory of Optoelectronic Materials Chemistry and Physics, Fujian Institute of Research on the Structure of Matter, Chinese Academy of Sciences, Fuzhou 350002, P. R. China

<sup>#</sup>University of the Chinese Academy of Sciences, Beijing, 100039, P. R. China

\* E-mail: hcz1988@hotmail.com; [hezz@fjirsm.ac.cn](mailto:hezz@fjirsm.ac.cn)

**Figure S1.** The grown crystals of (a)  $Cs_3Cu_3(OH)Cl_8$  and (b)  $Rb_3Cu_3(OH)Cl_8$ .

**Figure S2.** Energy-dispersive X-ray spectroscopy of (a)  $Cs_3Cu_3(OH)Cl_8$  and (b)  $Rb_3Cu_3(OH)Cl_8$ .

**Figure S3.** The coordinated environments of Cu and Cs atoms.

**Table S1.** Atomic coordinates and equivalent isotropic displacement parameters for  $Cs_3Cu_3(OH)Cl_8$ .

**Table S2.** Selected bond lengths and angles for  $Cs_3Cu_3(OH)Cl_8$ .

**Table S3.** Anisotropic displacement parameters for  $Cs_3Cu_3(OH)Cl_8$ .

**Table S4.** Atomic coordinates and equivalent isotropic displacement parameters for  $Rb_3Cu_3(OH)Cl_8$ .

**Table S5.** Selected bond lengths and angles for  $Rb_3Cu_3(OH)Cl_8$ .

**Table S6.** Anisotropic displacement parameters for  $Rb_3Cu_3(OH)Cl_8$ .

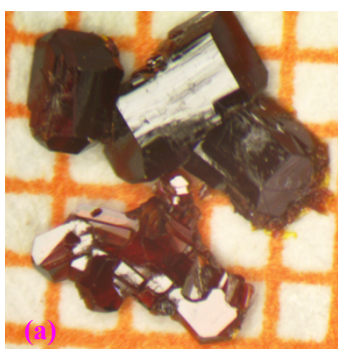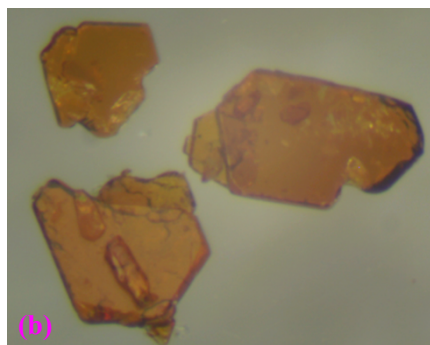

**Figure S1.** The grown crystals of (a)  $\text{Cs}_3\text{Cu}_3(\text{OH})\text{Cl}_8$  and (b)  $\text{Rb}_3\text{Cu}_3(\text{OH})\text{Cl}_8$ .

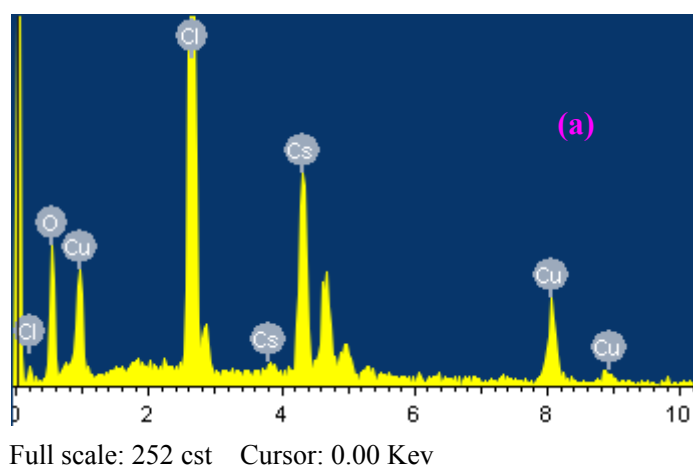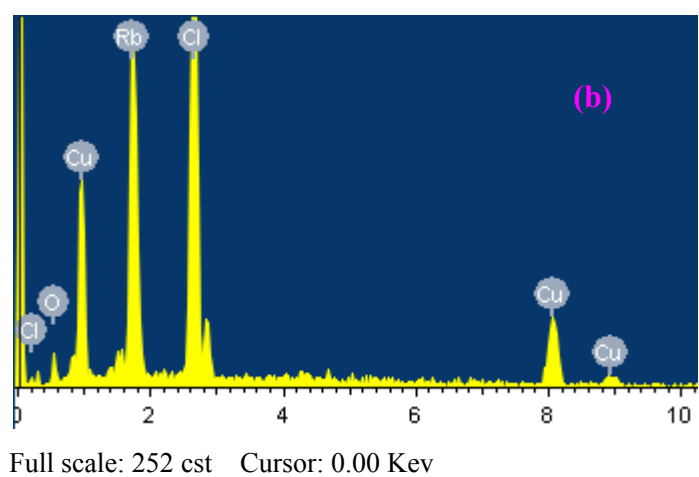

**Figure S2.** Energy-dispersive X-ray spectroscopy of (a)  $\text{Cs}_3\text{Cu}_3(\text{OH})\text{Cl}_8$  and (b)  $\text{Rb}_3\text{Cu}_3(\text{OH})\text{Cl}_8$ .

**Figure S3.** The coordinated environments of Cu and Cs atoms.

**Table S1.** Atomic coordinates ( $\times 10^4$ ) and equivalent isotropic displacement parameters ( $\text{\AA}^2 \times 10^3$ ) for  $\text{Cs}_3\text{Cu}_3(\text{OH})\text{Cl}_8$ .  $U(\text{eq})$  is defined as one third of the trace of the orthogonalized  $U_{ij}$  tensor.

| atom  | x       | y       | z        | $U(\text{eq})$ |
|-------|---------|---------|----------|----------------|
| Cs(1) | 3104(1) | 4039(1) | 4274(1)  | 28(1)          |
| Cs(2) | 5647(1) | 3844(1) | 1989(1)  | 25(1)          |
| Cs(3) | 681(1)  | 895(1)  | 1842(1)  | 29(1)          |
| Cu(1) | 2211(1) | 3873(1) | 869(1)   | 17(1)          |
| Cu(2) | 2706(1) | 6624(1) | 65(1)    | 17(1)          |
| Cu(3) | 1297(1) | 6584(1) | 1365(1)  | 17(1)          |
| Cl(1) | 3457(1) | 5445(1) | 2152(1)  | 20(1)          |
| Cl(2) | 781(1)  | 4510(1) | 1862(1)  | 19(1)          |
| Cl(3) | 3172(1) | 2069(1) | 1786(1)  | 26(1)          |
| Cl(4) | 1543(1) | 7357(1) | -2103(1) | 24(1)          |
| Cl(5) | 1892(1) | 8466(1) | 627(1)   | 20(1)          |
| Cl(6) | 864(1)  | 2557(1) | -417(1)  | 22(1)          |
| Cl(7) | 4219(1) | 7795(1) | 310(1)   | 26(1)          |
| Cl(8) | 3207(1) | 4588(1) | -471(1)  | 23(1)          |
| O     | 1482(2) | 5606(2) | 190(2)   | 14(1)          |

**Table S2.** Bond lengths [Å] and angles [deg] for Cs<sub>3</sub>Cu<sub>3</sub>(OH)Cl<sub>8</sub>.

|                     |            |                       |            |
|---------------------|------------|-----------------------|------------|
| Cu(1)-O             | 1.980(2)   | Cu(2)-O               | 1.991(2)   |
| Cu(3)-O             | 1.975(2)   | Cu(1)-Cl(3)           | 2.2332(11) |
| Cu(1)-Cl(6)         | 2.3142(11) | Cu(1)-Cl(1)           | 2.4038(11) |
| Cu(1)-Cl(8)         | 2.7789(11) | Cu(1)-Cl(2)           | 2.8510(11) |
| Cu(2)-Cl(7)         | 2.2327(11) | Cu(2)-Cl(8)           | 2.3143(11) |
| Cu(2)-Cl(5)         | 2.3934(11) | Cu(2)-Cl(4)           | 2.8084(13) |
| Cu(2)-Cl(1)         | 2.8458(13) | Cu(3)-Cl(4)#1         | 2.2366(11) |
| Cu(3)-Cl(2)         | 2.3314(11) | Cu(3)-Cl(5)           | 2.3902(11) |
| Cu(3)-Cl(6)#2       | 2.7697(13) | Cu(3)-Cl(1)           | 2.8646(12) |
| Cu(3)-O-Cu(1)       | 103.67(11) | Cu(3)-O-Cu(2)         | 102.75(11) |
| Cu(1)-O-Cu(2)       | 101.69(11) | Cu(1)-Cl(1)-Cu(2)     | 71.25(3)   |
| Cu(1)-Cl(1)-Cu(3)   | 71.73(3)   | Cu(2)-Cl(1)-Cu(3)     | 65.72(2)   |
| Cu(1)-Cl(6)-Cu(3)#2 | 121.38(4)  | Cu(3)#3-Cl(4)-Cu(2)   | 155.28(5)  |
| Cu(3)-Cl(2)-Cu(1)   | 72.96(3)   | Cu(3)-Cl(5)-Cu(2)     | 80.73(4)   |
| Cu(2)-Cl(8)-Cu(1)   | 73.75(3)   | Cl(3)-Cu(1)-Cl(6)     | 94.25(4)   |
| Cl(3)-Cu(1)-Cl(1)   | 91.72(4)   | Cl(6)-Cu(1)-Cl(1)     | 173.50(4)  |
| Cl(3)-Cu(1)-Cl(8)   | 104.11(4)  | Cl(6)-Cu(1)-Cl(8)     | 94.38(4)   |
| Cl(1)-Cu(1)-Cl(8)   | 86.65(4)   | Cl(3)-Cu(1)-Cl(2)     | 104.51(4)  |
| Cl(6)-Cu(1)-Cl(2)   | 90.89(4)   | Cl(1)-Cu(1)-Cl(2)     | 85.11(4)   |
| Cl(8)-Cu(1)-Cl(2)   | 150.40(3)  | Cl(7)-Cu(2)-Cl(8)     | 96.80(4)   |
| Cl(7)-Cu(2)-Cl(5)   | 94.51(4)   | Cl(8)-Cu(2)-Cl(5)     | 168.55(4)  |
| Cl(7)-Cu(2)-Cl(4)   | 95.51(4)   | Cl(8)-Cu(2)-Cl(4)     | 89.41(4)   |
| Cl(5)-Cu(2)-Cl(4)   | 91.29(4)   | Cl(7)-Cu(2)-Cl(1)     | 98.02(4)   |
| Cl(8)-Cu(2)-Cl(1)   | 86.81(4)   | Cl(5)-Cu(2)-Cl(1)     | 89.85(4)   |
| Cl(4)-Cu(2)-Cl(1)   | 166.29(3)  | Cl(7)-Cu(2)-Cu(1)     | 135.47(3)  |
| Cl(8)-Cu(2)-Cu(1)   | 60.06(3)   | Cl(5)-Cu(2)-Cu(1)     | 110.03(3)  |
| Cl(4)-Cu(2)-Cu(1)   | 119.52(3)  | Cl(1)-Cu(2)-Cu(1)     | 47.68(2)   |
| Cl(4)#1-Cu(3)-Cl(2) | 94.10(4)   | Cl(4)#1-Cu(3)-Cl(5)   | 95.66(4)   |
| Cl(2)-Cu(3)-Cl(5)   | 169.65(4)  | Cl(4)#1-Cu(3)-Cl(6)#2 | 90.76(4)   |
| Cl(2)-Cu(3)-Cl(6)#2 | 91.00(4)   | Cl(5)-Cu(3)-Cl(6)#2   | 92.34(4)   |
| Cl(4)#1-Cu(3)-Cl(1) | 95.65(4)   | Cl(2)-Cu(3)-Cl(1)     | 86.12(4)   |
| Cl(5)-Cu(3)-Cl(1)   | 89.47(3)   | Cl(6)#2-Cu(3)-Cl(1)   | 173.14(3)  |

Symmetry transformations used to generate equivalent atoms:

#1  $x, -y+3/2, z+1/2$     #2  $-x, -y+1, -z$     #3  $x, -y+3/2, z-1/2$

**Table S3.** Anisotropic displacement parameters ( $\text{Å}^2 \times 10^3$ ) for  $\text{Cs}_3\text{Cu}_3(\text{OH})\text{Cl}_8$ . The anisotropic displacement factor exponent takes the form:  $-2 \pi^2 [ h^2 a^{*2} U_{11} + \dots + 2 h k a^* b^* U_{12} ]$ .

| atom  | U11   | U22   | U33   | U23   | U13   | U12   |
|-------|-------|-------|-------|-------|-------|-------|
| Cs(1) | 23(1) | 32(1) | 32(1) | 4(1)  | 13(1) | -4(1) |
| Cs(2) | 14(1) | 32(1) | 30(1) | 1(1)  | 11(1) | 1(1)  |
| Cs(3) | 25(1) | 26(1) | 44(1) | 7(1)  | 23(1) | 3(1)  |
| Cu(1) | 11(1) | 15(1) | 24(1) | 1(1)  | 6(1)  | 0(1)  |
| Cu(2) | 11(1) | 17(1) | 29(1) | -2(1) | 13(1) | -2(1) |
| Cu(3) | 16(1) | 17(1) | 22(1) | -3(1) | 12(1) | -2(1) |
| Cl(1) | 11(1) | 24(1) | 24(1) | -1(1) | 6(1)  | -1(1) |
| Cl(2) | 14(1) | 20(1) | 27(1) | 1(1)  | 12(1) | -1(1) |
| Cl(3) | 20(1) | 20(1) | 34(1) | 6(1)  | 7(1)  | 4(1)  |
| Cl(4) | 23(1) | 28(1) | 21(1) | 7(1)  | 10(1) | 2(1)  |
| Cl(5) | 17(1) | 18(1) | 30(1) | -1(1) | 14(1) | 0(1)  |
| Cl(6) | 13(1) | 21(1) | 29(1) | -4(1) | 7(1)  | -1(1) |
| Cl(7) | 13(1) | 30(1) | 40(1) | -4(1) | 15(1) | -7(1) |
| Cl(8) | 22(1) | 21(1) | 32(1) | 0(1)  | 19(1) | 3(1)  |
| O     | 9(1)  | 14(1) | 22(1) | 0(1)  | 10(1) | -1(1) |

**Table S4.** Atomic coordinates ( $\times 10^4$ ) and equivalent isotropic displacement parameters ( $\text{Å}^2 \times 10^3$ ) for  $\text{Rb}_3\text{Cu}_3(\text{OH})\text{Cl}_8$ .  $U(\text{eq})$  is defined as one third of the trace of the orthogonalized  $U_{ij}$  tensor.

| atom  | x       | y        | z        | U(eq) |
|-------|---------|----------|----------|-------|
| Rb(1) | 4347(1) | 3814(1)  | 2961(1)  | 34(1) |
| Rb(2) | 6881(1) | 1009(1)  | 5750(1)  | 37(1) |
| Rb(3) | 699(1)  | 5963(1)  | 1839(1)  | 44(1) |
| Cu(1) | 1302(1) | 1630(1)  | 1368(1)  | 24(1) |
| Cu(2) | 2744(1) | 1676(1)  | 14(1)    | 24(1) |
| Cu(3) | 2282(1) | -1134(1) | 886(1)   | 24(1) |
| Cl(1) | 3329(2) | -419(2)  | -461(2)  | 33(1) |
| Cl(2) | 804(2)  | -463(2)  | 1935(2)  | 27(1) |
| Cl(3) | -912(2) | 2492(2)  | 399(2)   | 30(1) |
| Cl(4) | 3523(2) | 468(2)   | 2193(2)  | 28(1) |
| Cl(5) | 1899(2) | 3555(2)  | 611(2)   | 30(1) |
| Cl(6) | 3257(2) | -2979(2) | 1810(2)  | 36(1) |
| Cl(7) | 1489(2) | 2221(2)  | -2106(2) | 33(1) |
| Cl(8) | 4245(2) | 2947(2)  | 207(2)   | 36(1) |
| O     | 1512(4) | 612(5)   | 172(4)   | 23(1) |

**Table S5.** Bond lengths [Å] and angles [deg] for Rb<sub>3</sub>Cu<sub>3</sub>(OH)Cl<sub>8</sub>.

|                     |            |                     |            |
|---------------------|------------|---------------------|------------|
| Cu(1)-O             | 1.985(5)   | Cu(2)-O             | 1.993(5)   |
| Cu(3)-O             | 1.987(5)   | Cu(1)-Cl(7)#1       | 2.244(2)   |
| Cu(1)-Cl(2)         | 2.329(2)   | Cu(1)-Cl(5)         | 2.383(2)   |
| Cu(1)-Cl(3)         | 2.786(2)   | Cu(1)-Cl(4)         | 2.889(2)   |
| Cu(2)-Cl(8)         | 2.239(2)   | Cu(2)-Cl(1)         | 2.327(2)   |
| Cu(2)-Cl(5)         | 2.412(2)   | Cu(2)-Cl(7)         | 2.694(2)   |
| Cu(2)-Cl(4)         | 2.911(2)   | Cu(3)-Cl(6)         | 2.239(2)   |
| Cu(3)-Cl(3)#2       | 2.320(2)   | Cu(3)-Cl(4)         | 2.401(2)   |
| Cu(3)-Cl(1)         | 2.757(2)   | Cu(3)-Cl(2)         | 2.887(2)   |
| Cu(1)-Cu(2)         | 3.1014(13) | Cu(1)-Cu(3)         | 3.1219(13) |
| Cu(2)-Cu(3)         | 3.0899(13) | Cu(1)-O-Cu(3)       | 103.6(2)   |
| Cu(1)-O-Cu(2)       | 102.5(2)   | Cu(3)-O-Cu(2)       | 101.9(2)   |
| Cl(7)#1-Cu(1)-Cl(2) | 93.88(8)   | Cl(7)#1-Cu(1)-Cl(5) | 94.19(8)   |
| Cl(2)-Cu(1)-Cl(5)   | 171.21(7)  | Cl(7)#1-Cu(1)-Cl(3) | 89.32(7)   |
| Cl(2)-Cu(1)-Cl(3)   | 91.70(7)   | Cl(5)-Cu(1)-Cl(3)   | 91.87(7)   |
| Cl(7)#1-Cu(1)-Cl(4) | 96.80(7)   | Cl(2)-Cu(1)-Cl(4)   | 85.19(7)   |
| Cl(5)-Cu(1)-Cl(4)   | 90.40(7)   | Cl(3)-Cu(1)-Cl(4)   | 173.30(6)  |
| Cl(8)-Cu(2)-Cl(1)   | 97.41(8)   | Cl(8)-Cu(2)-Cl(5)   | 93.21(8)   |
| Cl(1)-Cu(2)-Cl(5)   | 168.57(8)  | Cl(8)-Cu(2)-Cl(7)   | 98.69(8)   |
| Cl(1)-Cu(2)-Cl(7)   | 90.46(8)   | Cl(5)-Cu(2)-Cl(7)   | 92.10(7)   |
| Cl(8)-Cu(2)-Cl(4)   | 99.43(8)   | Cl(1)-Cu(2)-Cl(4)   | 84.80(7)   |
| Cl(5)-Cu(2)-Cl(4)   | 89.32(7)   | Cl(7)-Cu(2)-Cl(4)   | 161.71(7)  |
| Cl(6)-Cu(3)-Cl(3)#2 | 93.75(8)   | Cl(6)-Cu(3)-Cl(4)   | 91.94(8)   |
| Cl(3)#2-Cu(3)-Cl(4) | 173.11(8)  | Cl(6)-Cu(3)-Cl(1)   | 103.46(8)  |
| Cl(3)#2-Cu(3)-Cl(1) | 95.51(8)   | Cl(4)-Cu(3)-Cl(1)   | 86.93(7)   |
| Cl(6)-Cu(3)-Cl(2)   | 104.69(8)  | Cl(3)#2-Cu(3)-Cl(2) | 90.82(7)   |
| Cl(4)-Cu(3)-Cl(2)   | 83.97(7)   | Cl(1)-Cu(3)-Cl(2)   | 150.64(7)  |
| Cu(3)-Cl(4)-Cu(1)   | 71.65(6)   | Cu(3)-Cl(4)-Cu(2)   | 70.39(6)   |
| Cu(1)-Cl(4)-Cu(2)   | 64.65(5)   | Cu(2)-Cl(1)-Cu(3)   | 74.31(6)   |
| Cu(1)-Cl(2)-Cu(3)   | 72.65(5)   | Cu(1)-Cl(5)-Cu(2)   | 80.59(7)   |
| Cu(1)#3-Cl(7)-Cu(2) | 148.07(10) | Cu(3)#2-Cl(3)-Cu(1) | 121.89(8)  |

Symmetry transformations used to generate equivalent atoms:

#1  $x, -y+3/2, z+1/2$     #2  $-x, -y+1, -z$     #3  $x, -y+3/2, z-1/2$

**Table S6.** Anisotropic displacement parameters ( $\text{Å}^2 \times 10^3$ ) for  $\text{Rb}_3\text{Cu}_3(\text{OH})\text{Cl}_8$ . The anisotropic displacement factor exponent takes the form:  $-2 \pi^2 [ h^2 a^{*2} U_{11} + \dots + 2 h k a^* b^* U_{12} ]$ .

| atom  | U11   | U22   | U33   | U23   | U13   | U12   |
|-------|-------|-------|-------|-------|-------|-------|
| Rb(1) | 31(1) | 37(1) | 40(1) | -1(1) | 19(1) | -1(1) |
| Rb(2) | 35(1) | 39(1) | 40(1) | 6(1)  | 17(1) | -4(1) |
| Rb(3) | 51(1) | 35(1) | 62(1) | 10(1) | 39(1) | 4(1)  |
| Cu(1) | 31(1) | 21(1) | 25(1) | -3(1) | 18(1) | -3(1) |
| Cu(2) | 24(1) | 22(1) | 32(1) | -1(1) | 18(1) | -2(1) |
| Cu(3) | 27(1) | 19(1) | 27(1) | 1(1)  | 12(1) | 0(1)  |
| Cl(1) | 41(1) | 26(1) | 44(1) | 4(1)  | 30(1) | 7(1)  |
| Cl(2) | 29(1) | 26(1) | 33(1) | 4(1)  | 19(1) | -1(1) |
| Cl(3) | 26(1) | 27(1) | 34(1) | -5(1) | 9(1)  | 0(1)  |
| Cl(4) | 26(1) | 29(1) | 29(1) | -2(1) | 11(1) | -2(1) |
| Cl(5) | 37(1) | 21(1) | 39(1) | -1(1) | 23(1) | 0(1)  |
| Cl(6) | 37(1) | 25(1) | 41(1) | 10(1) | 10(1) | 3(1)  |
| Cl(7) | 37(1) | 36(1) | 26(1) | 8(1)  | 13(1) | -2(1) |
| Cl(8) | 28(1) | 33(1) | 52(1) | 0(1)  | 21(1) | -7(1) |
| O     | 29(3) | 23(3) | 24(3) | 4(2)  | 17(2) | 4(2)  |
